# Supplementary material for: On the composition and isomerism effect in the thermal and structural properties of choline chloride/hydroxyphenol deep eutectic solvents
Source: Royal Society of Chemistry journal article supplement (doi:10.1039/d4cp01575d), 2024-01-01
Supplement: d4cp01575d1.pdf [file d4cp01575d1.pdf]

**Electronic Supplementary Information to:**  
**On the composition and isomerism effect in the**  
**thermal and structural properties of choline**  
**chloride/hydroxyphenol deep eutectic solvents**

Paolo Casu,<sup>†</sup> Matteo Busato,<sup>\*,†</sup> Matteo Palluzzi,<sup>†</sup> Riccardo Spezia,<sup>‡</sup> and Paola  
D'Angelo<sup>\*,†</sup>

*<sup>†</sup>Dipartimento di Chimica, Sapienza Università di Roma, P.le A. Moro 5, 00185 Rome,  
Italy*

*<sup>‡</sup>Sorbonne Université, CNRS, Laboratoire de Chimie Théorique, 4 place Jussieu, 75005  
Paris, France*

E-mail: [matteo.busato@uniroma1.it](mailto:matteo.busato@uniroma1.it); [p.dangelo@uniroma1.it](mailto:p.dangelo@uniroma1.it)

Table S1: Number of molecules and box dimensions of the simulated molecular dynamics (MD) systems formed by choline chloride (ChCl) with the catechol (Cate), resorcinol (Reso), and hydroquinone (Hydro) hydrogen-bond donors (HBDs) at different molar ratios of the components.

|                   |        | ChCl | HBD | Box edge (Å) |
|-------------------|--------|------|-----|--------------|
| <b>ChCl/Cate</b>  | 1:0.75 | 388  | 291 | 49.97        |
|                   | 1:1    | 349  | 349 | 49.99        |
|                   | 1:2    | 246  | 492 | 49.97        |
|                   | 1:3    | 191  | 573 | 49.97        |
| <b>ChCl/Reso</b>  | 1:0.75 | 392  | 294 | 50.17        |
|                   | 1:1    | 348  | 348 | 50.02        |
|                   | 1:2    | 246  | 492 | 50.01        |
|                   | 1:3    | 190  | 570 | 49.99        |
| <b>ChCl/Hydro</b> | 1:0.75 | 388  | 291 | 50.07        |
|                   | 1:1    | 346  | 346 | 49.99        |
|                   | 1:2    | 243  | 486 | 49.98        |
|                   | 1:3    | 189  | 567 | 50.05        |

Table S2: Liquid-glass transition temperature ( $T_g$ ), cold crystallization temperature ( $T_{cc}$ ), and melting temperature ( $T_m$ ) obtained from density scanning calorimetry thermograms for the ChCl/Cate, ChCl/Reso, and ChCl/Hydro mixtures at different molar ratios of the components, together with the difference ( $\Delta T$ ) between the  $T_m$  experimental values and those calculated from the ideal phase diagrams for the solid-liquid equilibrium (SLE) between the components ( $T_{m, ideal}$ ). Values in Kelvin degrees.

| Mixture           |        | $T_g$ | $T_{cc}$ | $T_m$ | $T_{m, ideal}$ | $\Delta T$ |
|-------------------|--------|-------|----------|-------|----------------|------------|
| <b>ChCl/Cate</b>  | 1:0.75 | -     | 264      | -     | 370            | -          |
|                   | 1:1    | 193   | 256      | 318   |                | -52        |
|                   | 1:2    | -     | -        | 328   |                | -42        |
|                   | 1:3    | 211   | 253      | 318   |                | -52        |
| <b>ChCl/Reso</b>  | 1:0.75 | 195   | 250      | 290   | 374            | -84        |
|                   | 1:1    | -     | -        | 302   |                | -72        |
|                   | 1:2    | 192   | -        | -     |                | -          |
|                   | 1:3    | 213   | -        | -     |                | -          |
| <b>ChCl/Hydro</b> | 1:0.75 | -     | -        | 326   | 429            | -103       |
|                   | 1:1    | -     | -        | 315   |                | -114       |
|                   | 1:2    | -     | -        | 316   |                | -113       |

Table S3: Enthalpy of fusion ( $\Delta_{cr}H_m$ ) and  $T_m$  of the pristine compounds taken from literature data and employed in this work to build the ideal SLE phase diagrams.

| Compound     | $\Delta_{cr}H_m(\text{kJ mol}^{-1})$ | $T_m(\text{K})$ | ref. |
|--------------|--------------------------------------|-----------------|------|
| <b>ChCl</b>  | 13.8                                 | $\sim 687$      | [1]  |
| <b>Cate</b>  | 22.5                                 | 377.5           | [2]  |
| <b>Reso</b>  | 19.4                                 | 382.5           | [2]  |
| <b>Hydro</b> | 26.9                                 | 445.4           | [2]  |

Table S4: Number of H-bonds and average number of H-bonds *per* chloride anion for the Cl-HO<sub>HBD</sub> and Cl-HO<sub>Ch</sub> interactions calculated from the MD simulations of the ChCl/Cate, ChCl/Reso, and ChCl/Hydro mixtures at different molar ratios of the components. Atom nomenclature according to Figure 1 of the manuscript.

|                   |        | Cl-HO <sub>HBD</sub> |                                | Cl-HO <sub>Ch</sub> |                                |
|-------------------|--------|----------------------|--------------------------------|---------------------|--------------------------------|
|                   |        | n° H-bond            | n° H-bond / n° Cl <sup>-</sup> | n° H-bond           | n° H-bond / n° Cl <sup>-</sup> |
| <b>ChCl/Cate</b>  | 1:0.75 | 543.76               | 1.40                           | 372.01              | 0.96                           |
|                   | 1:1    | 641.54               | 1.84                           | 322.67              | 0.92                           |
|                   | 1:2    | 798.26               | 3.24                           | 173.47              | 0.56                           |
|                   | 1:3    | 760.05               | 3.98                           | 77.18               | 0.40                           |
| <b>ChCl/Reso</b>  | 1:0.75 | 576.78               | 1.47                           | 378.92              | 0.97                           |
|                   | 1:1    | 675.48               | 1.94                           | 328.07              | 0.94                           |
|                   | 1:2    | 850.49               | 3.46                           | 187.26              | 0.76                           |
|                   | 1:3    | 783.57               | 4.12                           | 103.90              | 0.55                           |
| <b>ChCl/Hydro</b> | 1:0.75 | 567.91               | 1.46                           | 380.03              | 0.98                           |
|                   | 1:1    | 666.92               | 1.93                           | 332.86              | 0.96                           |
|                   | 1:2    | 829.75               | 3.41                           | 200.62              | 0.83                           |
|                   | 1:3    | 801.60               | 4.24                           | 116.22              | 0.61                           |

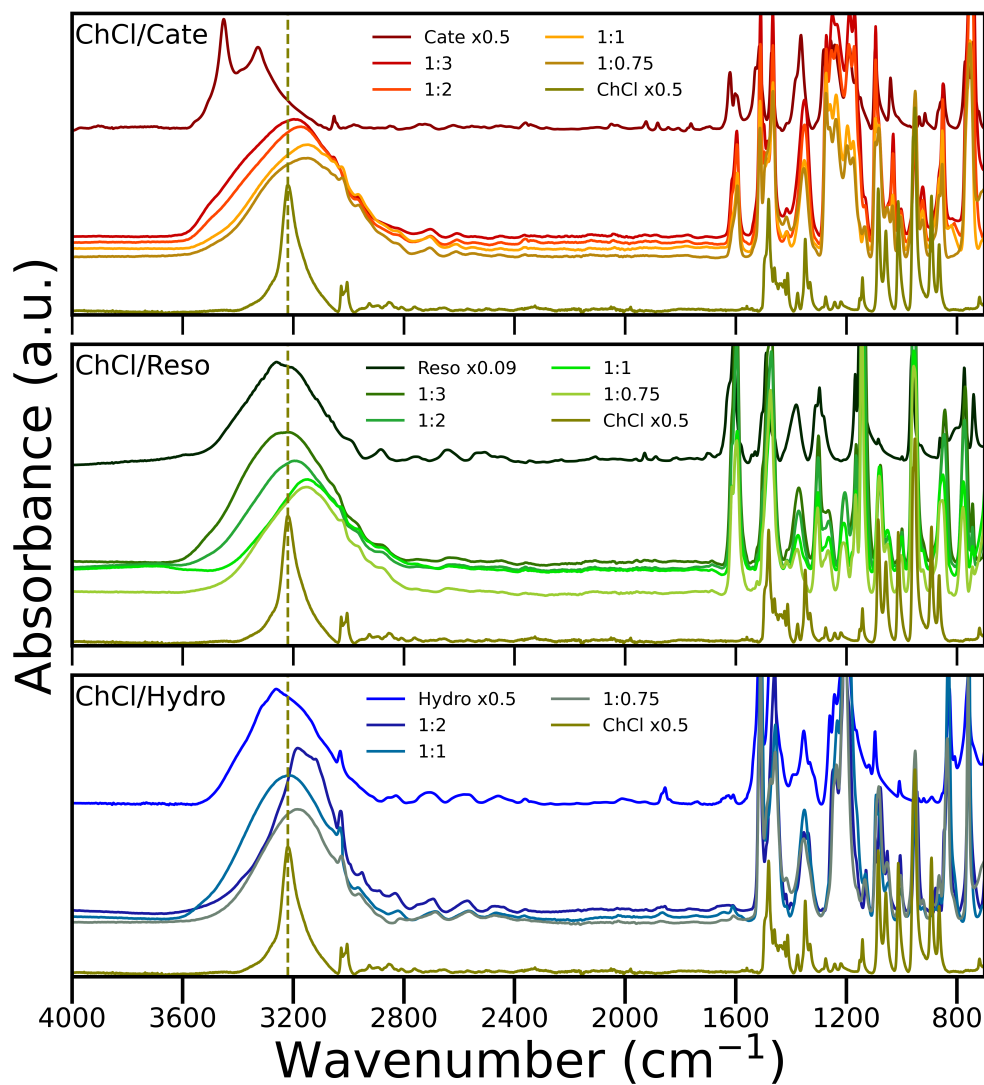

Figure S1: Attenuated total reflection Fourier transform infrared spectra collected on the ChCl/Cate, ChCl/Reso, and ChCl/Hydro mixtures at different molar ratios of the components. A vertical dashed line corresponding to the maximum of the O-H stretching absorption for the ChCl compound is reported as a guide to the eye.

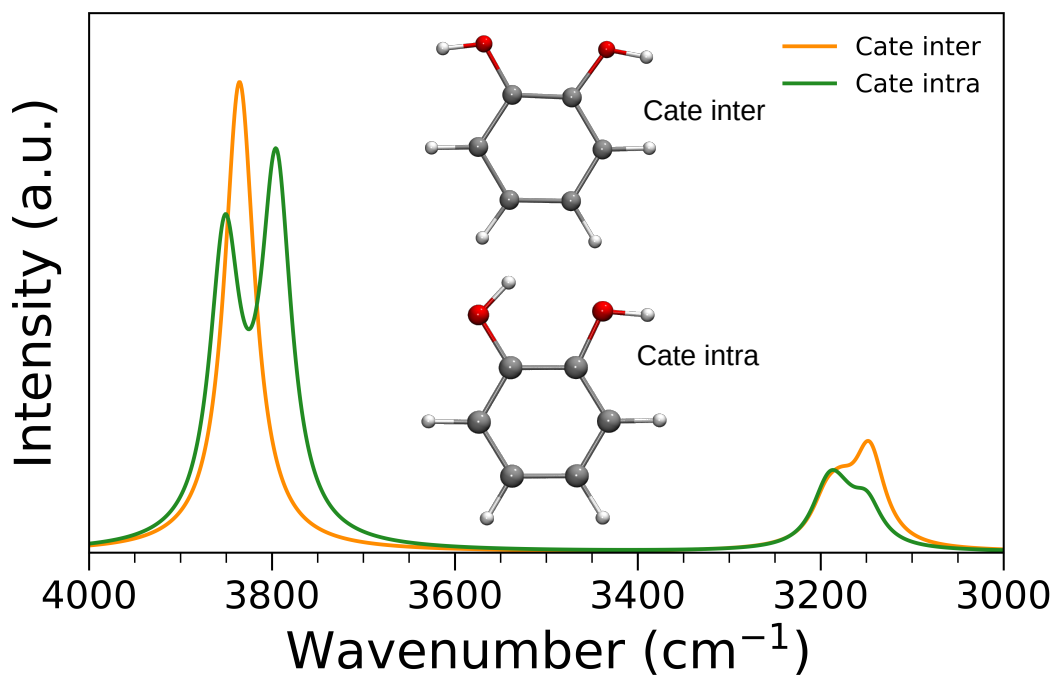

Figure S2: Simulated infrared spectra after geometrical optimization in gas-phase conditions for the two rotamers of the Cate molecule, Cate inter and Cate intra, at the density functional theory B3LYP/6-311++G(*d,p*)/GD3 level of theory.

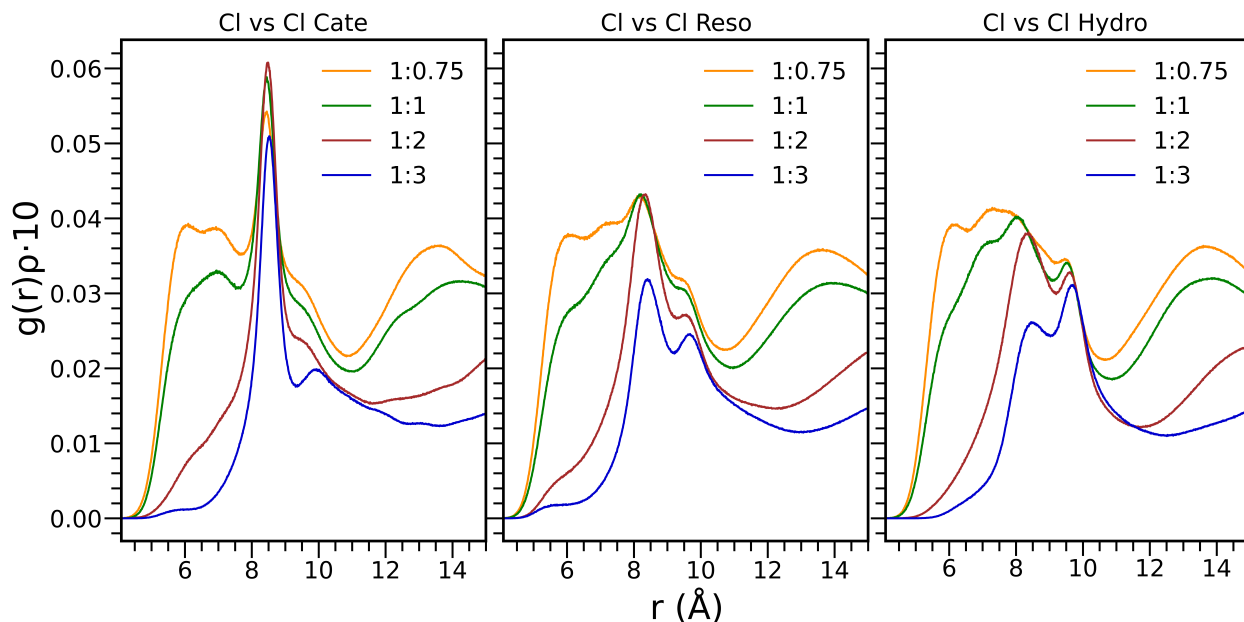

Figure S3: Radial distribution functions multiplied by the number density of the observed species,  $g(r)\rho$ 's, for the Cl-Cl pairs calculated from the MD simulations of the ChCl/Cate (left), ChCl/Reso (middle), and ChCl/Hydro (right) mixtures at different molar ratios of the components.

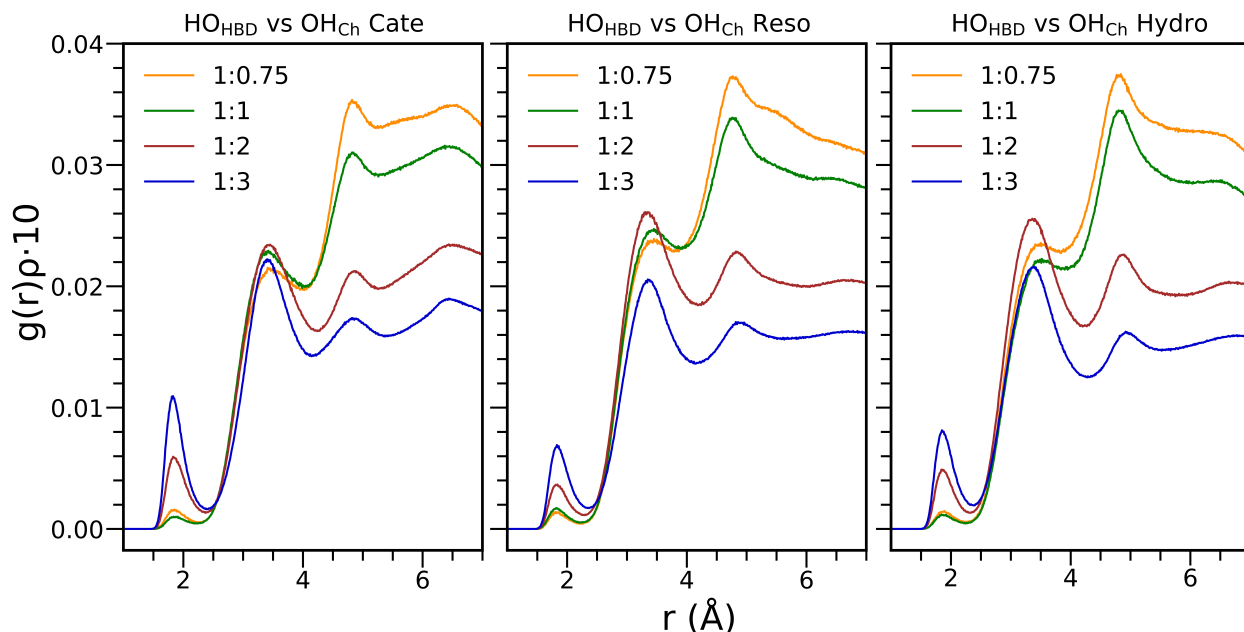

Figure S4: Radial distribution functions multiplied by the number density of the observed species,  $g(r)\rho$ 's, for the  $\text{HO}_{\text{HBD}}$ - $\text{OH}_{\text{Ch}}$  pairs calculated from the MD simulations of the ChCl/Cate (left), ChCl/Reso (middle), and ChCl/Hydro (right) mixtures at different molar ratios of the components. Atom nomenclature according to Figure 1 of the manuscript.

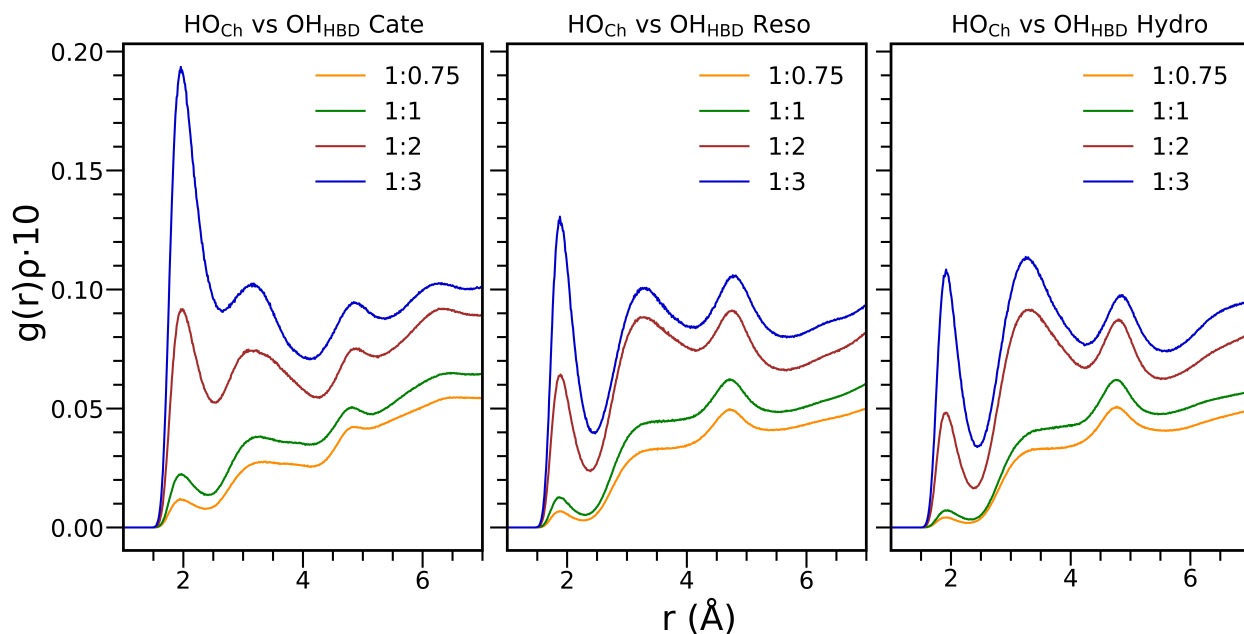

Figure S5: Radial distribution functions multiplied by the number density of the observed species,  $g(r)\rho$ 's, for the  $\text{HO}_{\text{Ch}}$ - $\text{OH}_{\text{HBD}}$  pairs calculated from the MD simulations of the ChCl/Cate (left), ChCl/Reso (middle), and ChCl/Hydro (right) mixtures at different molar ratios of the components. Atom nomenclature according to Figure 1 of the manuscript.

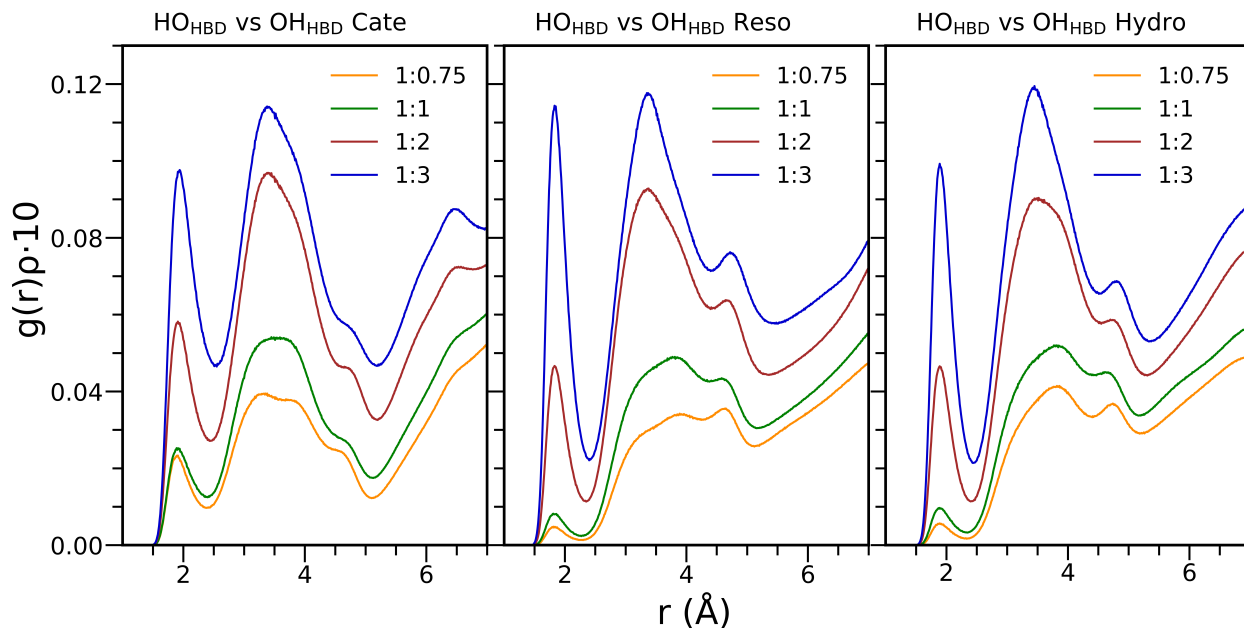

Figure S6: Radial distribution functions multiplied by the number density of the observed species,  $g(r)\rho$ 's, for the  $\text{HO}_{\text{HBD}}\text{-OH}_{\text{HBD}}$  pairs calculated from the MD simulations of the ChCl/Cate (left), ChCl/Reso (middle), and ChCl/Hydro (right) mixtures at different molar ratios of the components. Atom nomenclature according to Figure 1 of the manuscript.

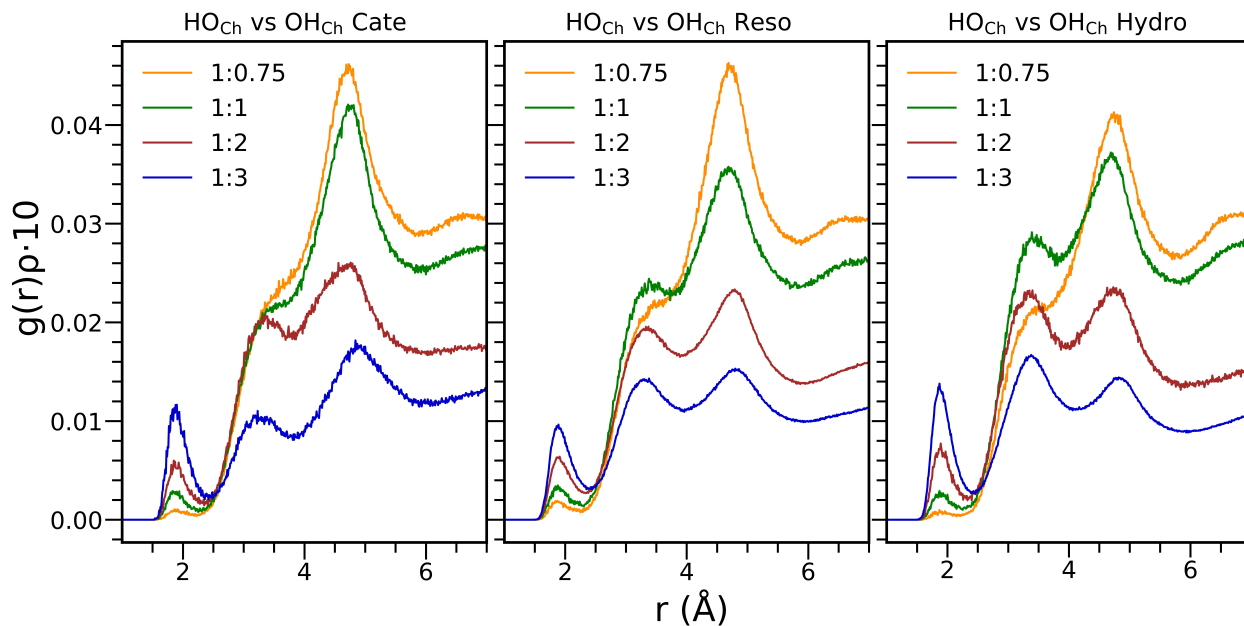

Figure S7: Radial distribution functions multiplied by the number density of the observed species,  $g(r)\rho$ 's, for the  $\text{HO}_{\text{Ch}}\text{-OH}_{\text{Ch}}$  pairs calculated from the MD simulations of the ChCl/Cate (left), ChCl/Reso (middle), and ChCl/Hydro (right) mixtures at different molar ratios of the components. Atom nomenclature according to Figure 1 of the manuscript.



## References

- [1] Adriaan van den Bruinhorst et al. “Defying decomposition: the curious case of choline chloride”. In: *Nat. Commun.* 14.1 (2023), p. 6684.
- [2] Sergey P Verevkin and Svetlana A Kozlova. “Di-hydroxybenzenes: Catechol, resorcinol, and hydroquinone: Enthalpies of phase transitions revisited”. In: *Thermochim. Acta* 471.1-2 (2008), pp. 33–42.
